# Supplementary material for: Genotype Combinations Drive Variability in the Microbiome Configuration of the Rhizosphere of Maize/Bean Intercropping System
Source: MDPI journal article supplement (doi:10.3390/ijms25021288), 2024-01-20

## Supplementary material

**Table S1. Physical/chemical characteristics of the soil.** The ratings are expressed according to the classifications published by the United States Department of Agriculture and the Italian Association of Public Agrochemical Laboratories. Soil analyses were performed by the Regional Agrochemical Centre Analysis Laboratory using standard operational procedures.

| Physiochemical properties of the soils |      | Ratings               |
|----------------------------------------|------|-----------------------|
| pH                                     | 8.22 | alkaline              |
| Soil texture                           |      | tending clayey        |
| Sand (g/Kg)                            | 178  |                       |
| Silt (g/Kg)                            | 425  |                       |
| Clay (g/Kg)                            | 397  |                       |
| Active limestone (g/Kg)                | 126  | very high             |
| Total limestone (g/Kg)                 | 234  | moderately calcareous |
| Assimilable phosphorus (mg/Kg)         | 9.5  | low                   |
| Exchangeable sodium (mg/Kg)            | 40   |                       |
| Exchangeable calcium (mg/Kg)           | 5467 |                       |
| Cation exchange capacity (meq/100g)    | 23.5 | high                  |
| Assimilable iron (mg/Kg)               | 8.6  | low                   |
| Assimilable manganese (mg/Kg)          | 3.3  | very low              |
| Assimilable zinc (mg/Kg)               | 0.43 | low                   |
| Assimilable copper (mg/Kg)             | 3.4  | medium                |
| Soluble boron (mg/Kg)                  | 0.25 | low                   |
| C/N                                    | 9.3  | regular               |
| Organic matter                         |      | low                   |
| Total nitrogen                         | 1.05 | medium                |
| Mg/K                                   | 6.1  |                       |
| Exchangeable magnesium (mg/Kg)         | 389  | high                  |
| Exchangeable phosphorus (mg/Kg)        | 204  | high                  |

**Table S2. Anova on Alpha-diversity indexes for Plant status and Cropping system.** Results of Anova applied to Chao1 and Shannon index values to test the effect of Cropping System and Plant Status.

| Chao1           | Df | Sum Sq   | Mean Sq | F value | Pr(>F) |
|-----------------|----|----------|---------|---------|--------|
| Year            | 1  | 178667   | 178667  | 0.549   | 0.461  |
| Replicates      | 2  | 299654   | 149827  | 0.46    | 0.633  |
| Cropping system | 1  | 134212   | 134212  | 0.412   | 0.523  |
| Plant status    | 1  | 1349759  | 1349759 | 4.144   | 0.045* |
| Residuals       | 89 | 28988579 | 325714  |         |        |
| Shannon         | Df | Sum Sq   | Mean Sq | F value | Pr(>F) |
| Year            | 1  | 0.07     | 0.069   | 1.666   | 0.200  |
| Replicates      | 2  | 0.089    | 0.045   | 1.072   | 0.347  |
| Cropping system | 1  | 0.009    | 0.009   | 0.216   | 0.643  |
| Plant status    | 1  | 0.177    | 0.177   | 4.245   | 0.042* |
| Residuals       | 89 | 3.715    | 0.042   |         |        |

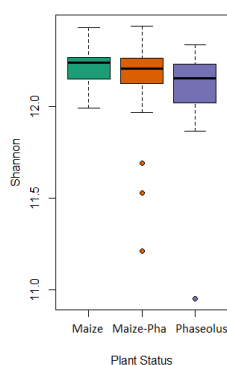

**Figure S1. Means of Shannon diversity index for Plant Status.** Boxplots of Shannon diversity index values for means of maize and beans in SC and for the IC condition (Plant Status).

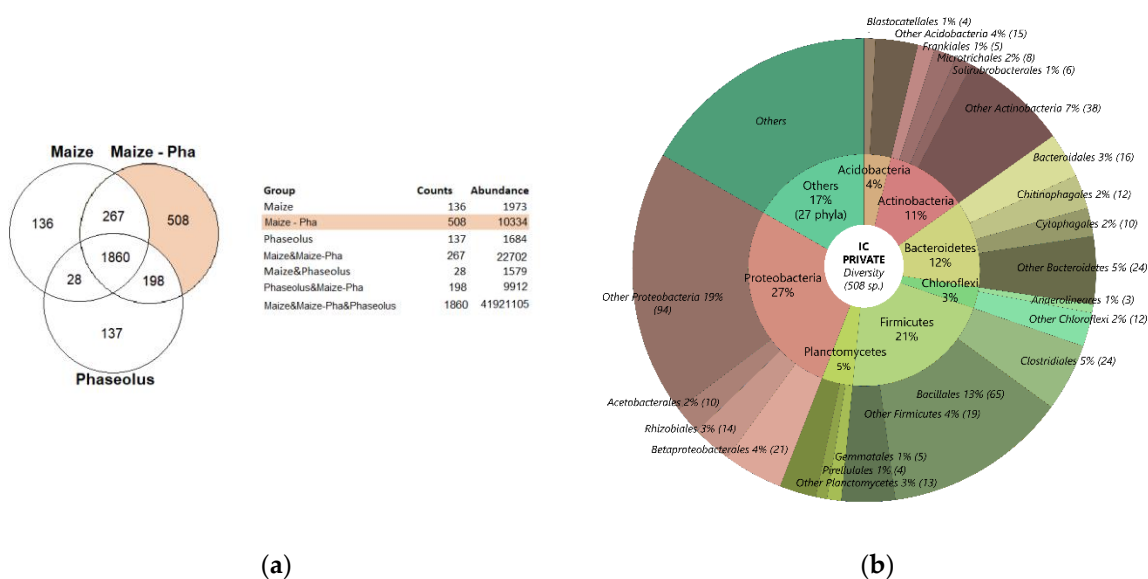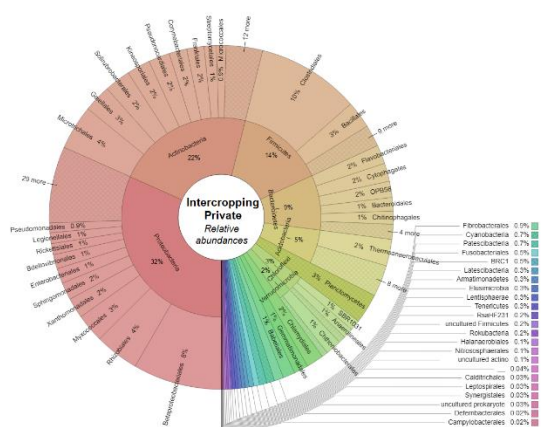

(c)

**Figure S2. Diversity and composition of private bacterial members of IC condition.** (A) Venn diagram of bacterial species belonging to each subset with number of taxa and total reads for each subset. (B) Doughnut plot of total bacterial diversity for private members of IC condition with percentages of phyla in the inner circle and orders in the outer circle. (C) Krona plot of relative abundances of the bacterial members that are private of the IC condition.

**Table S3. Multi-factorial Anova on Chao1 index to test the effect of genotypes combinations in IC.** Results of the multi-factorial Anova applied to Chao1 diversity index values.

|                                       | Df | Sum Sq   | Mean Sq | F value | Pr(>F)  |
|---------------------------------------|----|----------|---------|---------|---------|
| Year                                  | 1  | 22171    | 22171   | 0.069   | 0.793   |
| Replicates                            | 2  | 771458   | 385729  | 1.202   | 0.305   |
| Environment                           | 4  | 1461652  | 365413  | 1.138   | 0.343   |
| Replicates:Environment                | 8  | 3101719  | 387715  | 1.208   | 0.303   |
| Environment:Accession                 | 23 | 14361557 | 624416  | 1.945   | 0.013 * |
| Year:Replicates                       | 2  | 752579   | 376290  | 1.172   | 0.314   |
| Year:Replicates:Environment           | 12 | 5332940  | 444412  | 1.384   | 0.187   |
| Year:Replicates:Environment:Accession | 49 | 14752634 | 301074  | 0.938   | 0.591   |
| Residuals                             | 95 | 30495176 | 321002  |         |         |

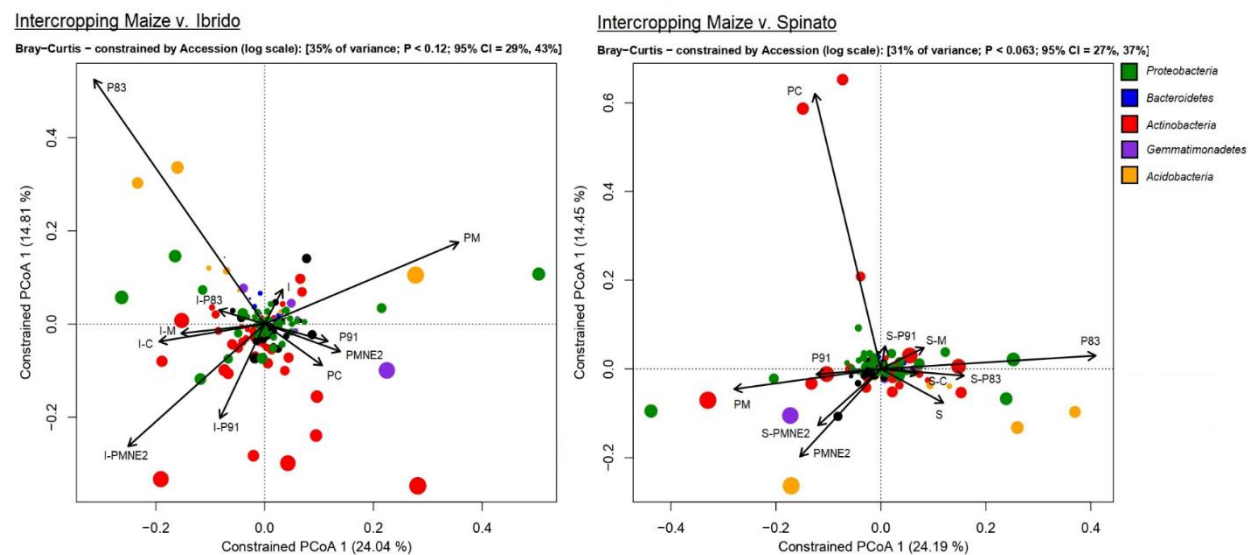

**Figure S3. CPcoA for IC combinations with maize I and S.** Constrained Principal Coordinate analysis (PcoA) and biplot of phyla scores of PcoA analysis based on Bray-Curtis distances of rhizosphere samples IC systems of S and I, constrained by “Accessions” including maize and beans in SC and different IC combination with the maize line. The percentage of variation explained by each axis refers to the fraction of the total variance of the data explained by the constrained factor (35% and 31% for I and S systems, respectively). CAP analysis failed to show a significant effect on sample clustering by “Accessions” ( $p < 0.12$  and  $p < 0.063$  in I and S, respectively). The arrows point to the centroid of the constrained factor.

Circle size depicts the relative abundance of phyla (log scale) that were more contributing in clustering samples. Colors illustrate different phyla as reported in the legend.

**Table S4. p-values and LDA scores of LefSE analysis.** Table showing results derived by the Linear discriminant analysis Effect Size (LEfSe) for the bacterial communities at genus level identifying biomarkers between Maize and Phaseolus in SC and Maize – Phaseolus in IC.

| Taxa                                                                                                                                                                          | Group     | pvalue  | LDA      |
|-------------------------------------------------------------------------------------------------------------------------------------------------------------------------------|-----------|---------|----------|
| k_Bacteria p_Proteobacteria c_Gammaproteobacteria o_Betaproteobacteriales                                                                                                     | Maize     | 0.04011 | 3.986829 |
| k_Bacteria p_Proteobacteria c_Gammaproteobacteria o_Betaproteobacteriales f_Burkholderiaceae                                                                                  | Maize     | 0.04692 | 3.946383 |
| k_Bacteria p_Proteobacteria c_Gammaproteobacteria o_Betaproteobacteriales f_Nitrosomonadaceae                                                                                 | Phaseolus | 0.00342 | 3.891149 |
| k_Bacteria p_Proteobacteria c_Gammaproteobacteria o_Betaproteobacteriales f_Nitrosomonadaceae g_MND1                                                                          | Phaseolus | 0.00484 | 3.868153 |
| k_Bacteria p_Actinobacteria c_Actinobacteria                                                                                                                                  | Maize-Pha | 0.01247 | 3.839024 |
| k_Bacteria p_Actinobacteria c_Actinobacteria o_Propionibacteriales f_Nocardioidaceae g_Nocardioides                                                                           | Maize-Pha | 0.00349 | 3.528047 |
| k_Bacteria p_Actinobacteria c_Actinobacteria o_Propionibacteriales                                                                                                            | Maize-Pha | 0.00615 | 3.495445 |
| k_Bacteria p_Actinobacteria c_Actinobacteria o_Propionibacteriales f_Nocardioidaceae                                                                                          | Maize-Pha | 0.00615 | 3.495445 |
| k_Bacteria p_Actinobacteria c_Actinobacteria o_Streptomycetales                                                                                                               | Maize-Pha | 0.02654 | 3.486422 |
| k_Bacteria p_Actinobacteria c_Actinobacteria o_Streptomycetales f_Streptomycetaceae                                                                                           | Maize-Pha | 0.02654 | 3.486422 |
| k_Bacteria p_Actinobacteria c_Actinobacteria o_Streptomycetales f_Streptomycetaceae g_Streptomyces                                                                            | Maize-Pha | 0.02654 | 3.486422 |
| k_Bacteria p_Proteobacteria c_Deltaproteobacteria o_Myxococcales f_Haliangiaceae                                                                                              | Phaseolus | 0.04737 | 3.472508 |
| k_Bacteria p_Proteobacteria c_Deltaproteobacteria o_Myxococcales f_Haliangiaceae g_Haliangium                                                                                 | Phaseolus | 0.04737 | 3.472508 |
| k_Bacteria p_Actinobacteria c_Actinobacteria o_Micrococcales                                                                                                                  | Maize     | 0.01431 | 3.411162 |
| k_Bacteria p_Verrucomicrobia                                                                                                                                                  | Maize     | 0.02435 | 3.293216 |
| k_Bacteria p_Verrucomicrobia c_Verrucomicrobiae                                                                                                                               | Maize     | 0.02435 | 3.293216 |
| k_Bacteria p_Verrucomicrobia c_Verrucomicrobiae o_Pedosphaerales                                                                                                              | Maize     | 0.02332 | 3.199208 |
| k_Bacteria p_Verrucomicrobia c_Verrucomicrobiae o_Pedosphaerales f_Pedosphaeraceae                                                                                            | Maize     | 0.02332 | 3.199208 |
| k_Bacteria p_Proteobacteria c_Deltaproteobacteria o_NB1-j                                                                                                                     | Phaseolus | 0.02816 | 3.190599 |
| k_Bacteria p_Actinobacteria c_Actinobacteria o_Pseudonocardiales f_Pseudonocardiaceae g_Lechevalieria                                                                         | Maize     | 0.01147 | 3.162907 |
| k_Bacteria p_Actinobacteria c_Actinobacteria o_Micrococcales f_Micrococcaceae                                                                                                 | Maize     | 0.00929 | 3.072155 |
| k_Bacteria p_Entotheonellaeota                                                                                                                                                | Maize-Pha | 0.01402 | 3.058515 |
| k_Bacteria p_Entotheonellaeota c_Entotheonellia                                                                                                                               | Maize-Pha | 0.01402 | 3.058515 |
| k_Bacteria p_Entotheonellaeota c_Entotheonellia o_Entotheonellales f_Entotheonellaceae                                                                                        | Maize-Pha | 0.01402 | 3.058515 |
| k_Bacteria p_Entotheonellaeota c_Entotheonellia o_Entotheonellales                                                                                                            | Maize-Pha | 0.01402 | 3.058515 |
| k_Bacteria p_Actinobacteria c_Actinobacteria o_Micrococcales f_Microbacteriaceae g_Agromyces                                                                                  | Maize-Pha | 0.02815 | 3.017008 |
| k_Bacteria p_Actinobacteria c_Actinobacteria o_Micrococcales f_Microbacteriaceae                                                                                              | Maize-Pha | 0.02815 | 3.017008 |
| k_Bacteria p_Proteobacteria c_Gammaproteobacteria o_Pseudomonadales                                                                                                           | Maize     | 0.02981 | 3.016641 |
| k_Bacteria p_Proteobacteria c_Gammaproteobacteria o_Pseudomonadales f_Pseudomonadaceae g_Pseudomonas                                                                          | Maize     | 0.02981 | 3.016641 |
| k_Bacteria p_Proteobacteria c_Gammaproteobacteria o_Pseudomonadales f_Pseudomonadaceae                                                                                        | Maize     | 0.02981 | 3.016641 |
| k_Bacteria p_Actinobacteria c_Actinobacteria o_Corynebacteriales                                                                                                              | Maize-Pha | 0.04192 | 2.963743 |
| k_Bacteria p_Verrucomicrobia c_Verrucomicrobiae o_Verrucomicrobiales f_Rubritaleaceae                                                                                         | Maize     | 0.00047 | 2.93693  |
| k_Bacteria p_Verrucomicrobia c_Verrucomicrobiae o_Verrucomicrobiales                                                                                                          | Maize     | 0.00047 | 2.93693  |
| k_Bacteria p_Verrucomicrobia c_Verrucomicrobiae o_Verrucomicrobiales f_Rubritaleaceae g_Luteolibacter                                                                         | Maize     | 0.00047 | 2.93693  |
| k_Bacteria p_Proteobacteria c_Deltaproteobacteria o_Myxococcales f_Archangiaceae                                                                                              | Maize-Pha | 0.04081 | 2.734768 |
| k_Bacteria p_Actinobacteria c_Actinobacteria o_Micrococcales f_Intrasporangiaceae                                                                                             | Maize-Pha | 0.01    | 2.733414 |
| k_Bacteria p_Cyanobacteria c_Oxyphotobacteria o_Chloroplast f_Phaseolus acutifolius (tepary bean)                                                                             | Phaseolus | 0.01608 | 2.604061 |
| k_Bacteria p_Cyanobacteria c_Oxyphotobacteria o_Chloroplast f_Phaseolus acutifolius (tepary bean) g_Phaseolus acutifolius (tepary bean)                                       | Phaseolus | 0.01608 | 2.604061 |
| k_Bacteria p_Cyanobacteria c_Oxyphotobacteria o_Chloroplast f_Phaseolus acutifolius (tepary bean) g_Phaseolus acutifolius (tepary bean) s_Phaseolus acutifolius (tepary bean) | Phaseolus | 0.01608 | 2.604061 |







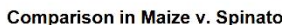

## Comparison in Maize v. Ibrido

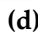

**Figure S4. Bacterial genera differentially expressed in IC combinations.** Log2 Fold Changes and average expressions of bacterial genera differentially expressed obtained with the FitZig model applied at “Accession” level on log transformed counts for each “Environment” (A. Biancoperla, B. Ottofile, C. Spinato, D. Ibrido). Bacterial genera are grouped by phyla and all genera differentially expressed are reported. Intersection plots showing genera differentially expressed and up and down regulated in each comparison are reported. Blue dots are reported in correspondence of bacterial genera that properly belong to the intercropping system.

### IC combinations with Maize Ottofile

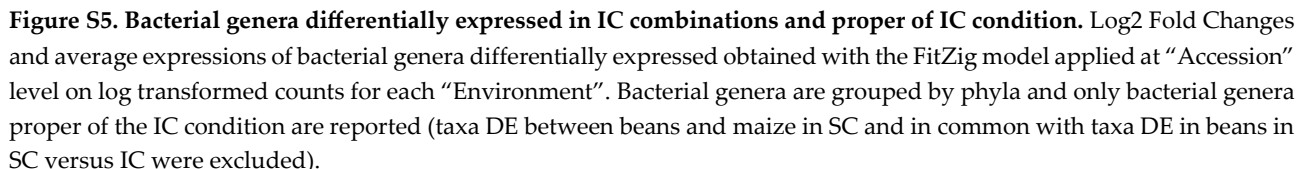

Supplement: s1 [file s1]
